# Supplementary material for: Exploring structural, magnetic, and catalytic diversity in tetranuclear {Cu4O4} cubane cores and a dinuclear complex derived from closely related ligand systems
Source: Royal Society of Chemistry journal article supplement (doi:10.1039/d4dt03283g), 2025-01-01
Supplement: d4dt03283g1.pdf [file d4dt03283g1.pdf]

## Supporting Information

### Exploring structural, magnetic, and catalytic diversity in tetranuclear {Cu<sub>4</sub>O<sub>4</sub>} cubane cores and a dinuclear complex derived from closely related ligand systems

Narayan Ch. Jana,<sup>a</sup> Albert Escuer,<sup>b,c</sup> Paula Brandão,<sup>d</sup> and Anangamohan Panja,<sup>a,e,\*</sup>

<sup>a</sup> Department of Chemistry, Panskura Banamali College, Panskura RS, WB 721152, India, India. E-mail: ampanja@yahoo.co.in

<sup>b</sup> Departament de Química Inorgànica i Orgànica, Secció de Química Inorgànica, Universitat de Barcelona, Martí i Franques 1-11, Barcelona-08028, Spain

<sup>c</sup> Institut de Nanociència i Nanotecnologia (IN<sup>2</sup>UB), Universitat de Barcelona, Barcelona-08028, Spain.

<sup>d</sup> Department of Chemistry, CICECO-Aveiro Institute of Materials, University of Aveiro, 3810-193 Aveiro, Portugal

<sup>e</sup> Department of Chemistry, Gokhale Memorial Girls' College, 1/1 Harish Mukherjee Road, Kolkata-700020, India.

## Characteristic spectra of ligands

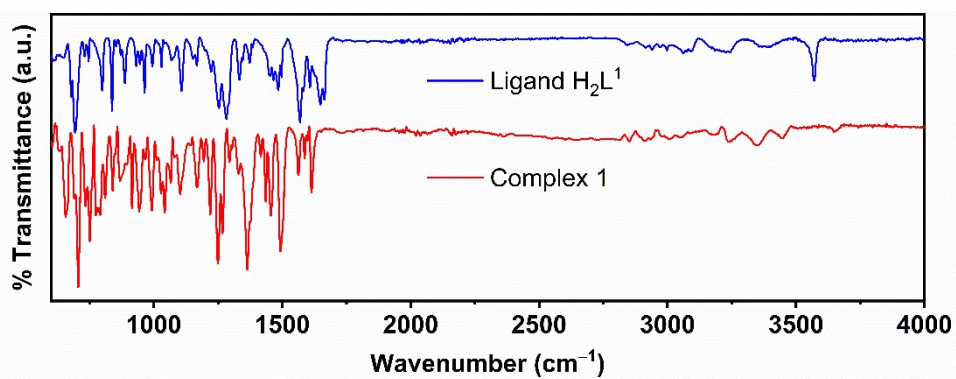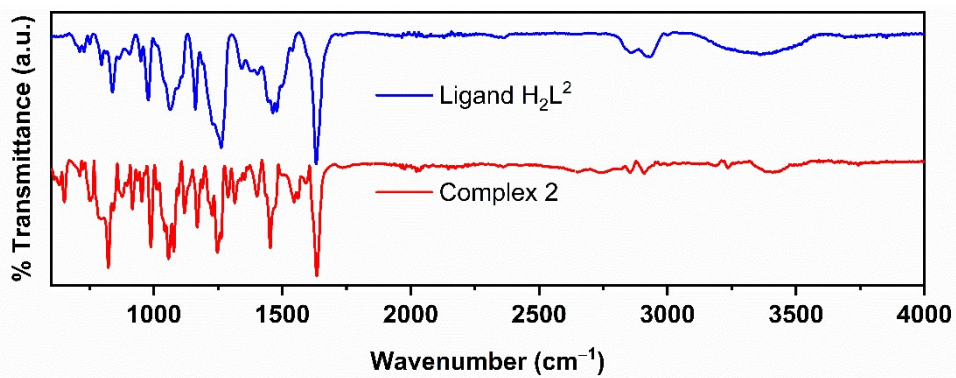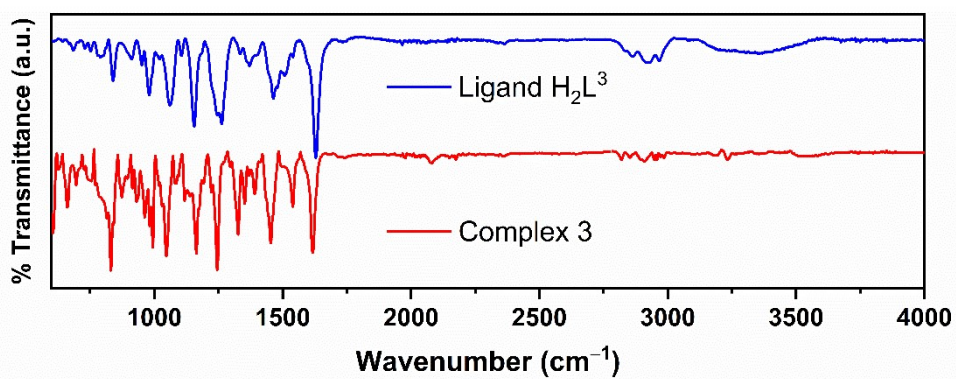

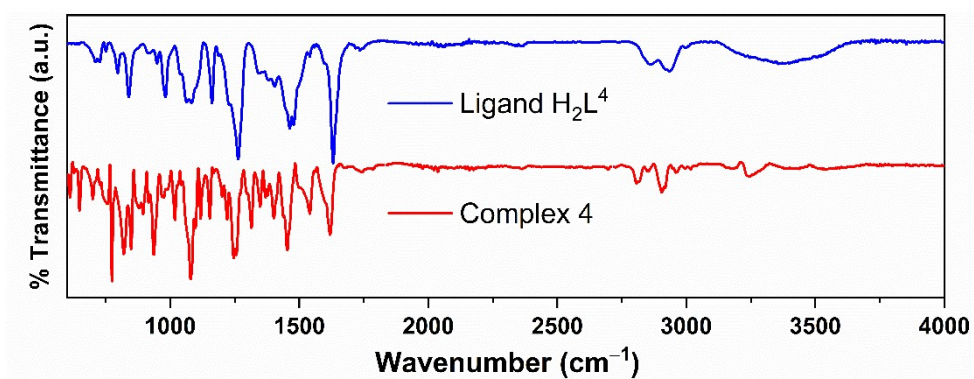

**Fig. S1:** FT-TR spectra of the four ligands and their corresponding complexes.

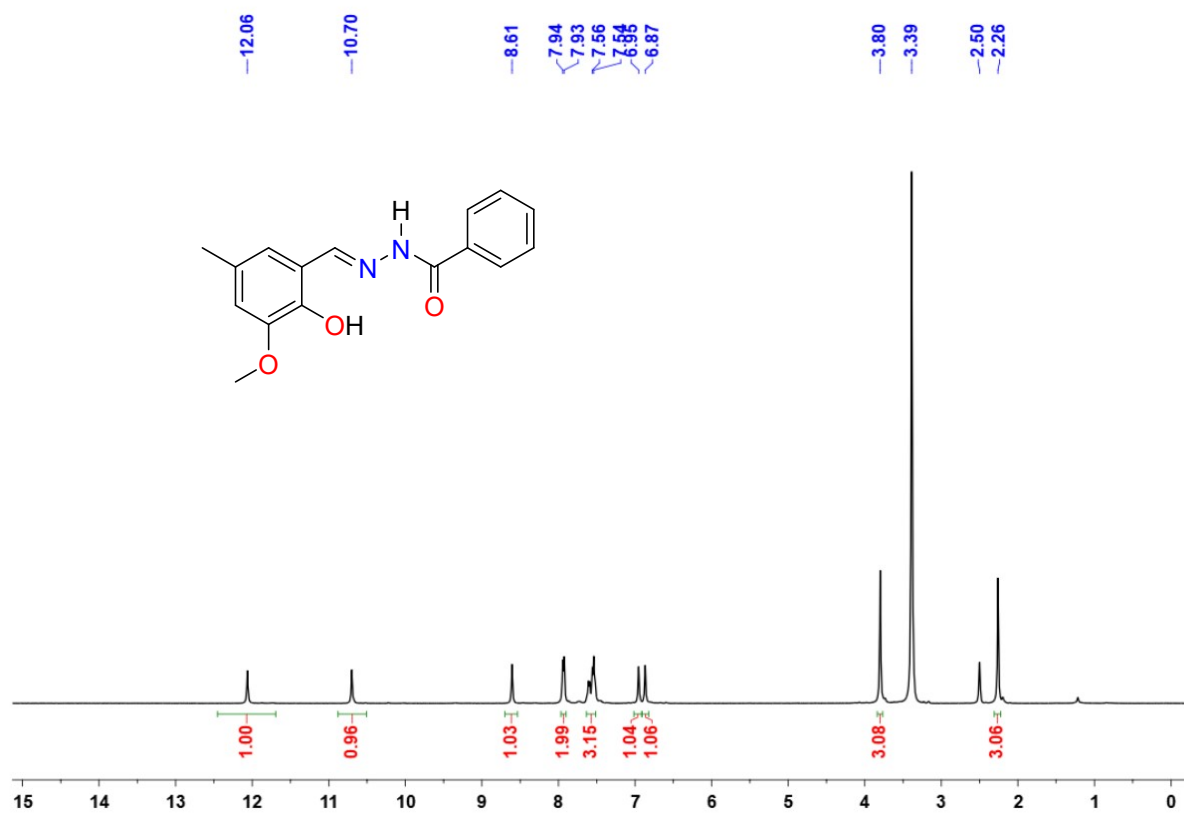

**Fig. S2:**  $^1\text{H}$  NMR of  $N'$ -(2-hydroxy-3-methoxy-5-methylbenzylidene)benzohydrazide ( $\text{H}_2\text{L}^1$ ) in  $\text{DMSO } d_6$  at r.t.

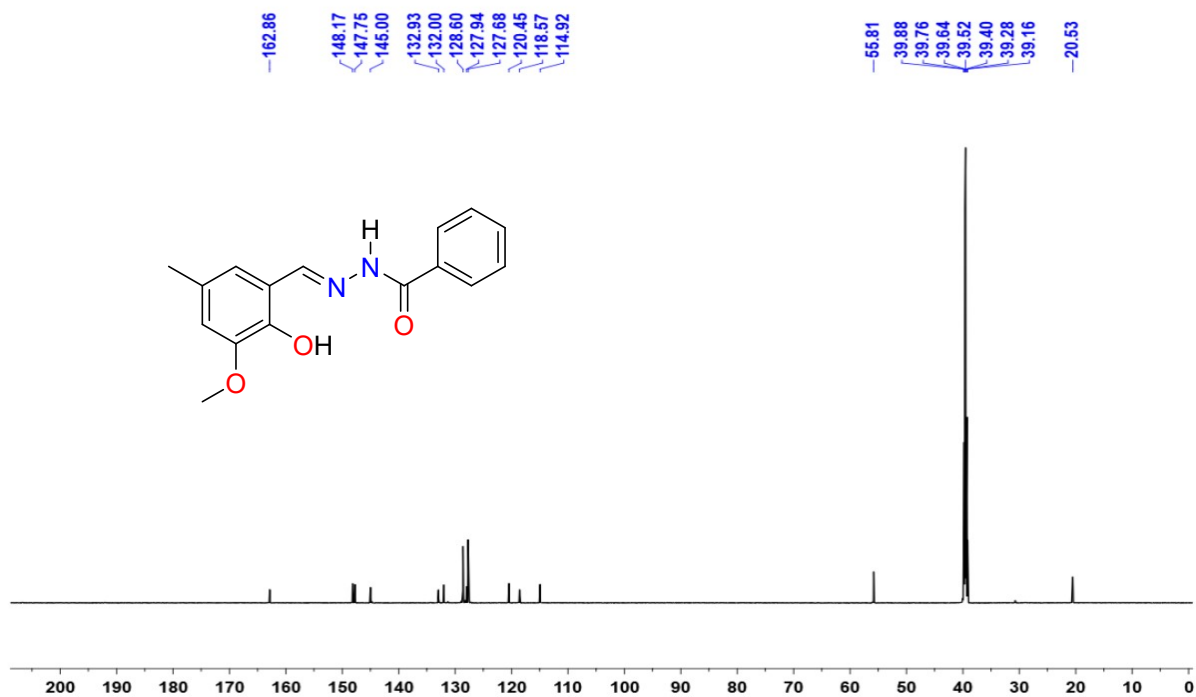

**Fig. S3:** <sup>13</sup>C NMR of *N'*-(2-hydroxy-3-methoxy-5-methylbenzylidene)benzohydrazide (H<sub>2</sub>L<sup>1</sup>) in DMSO d<sub>6</sub> at r.t..

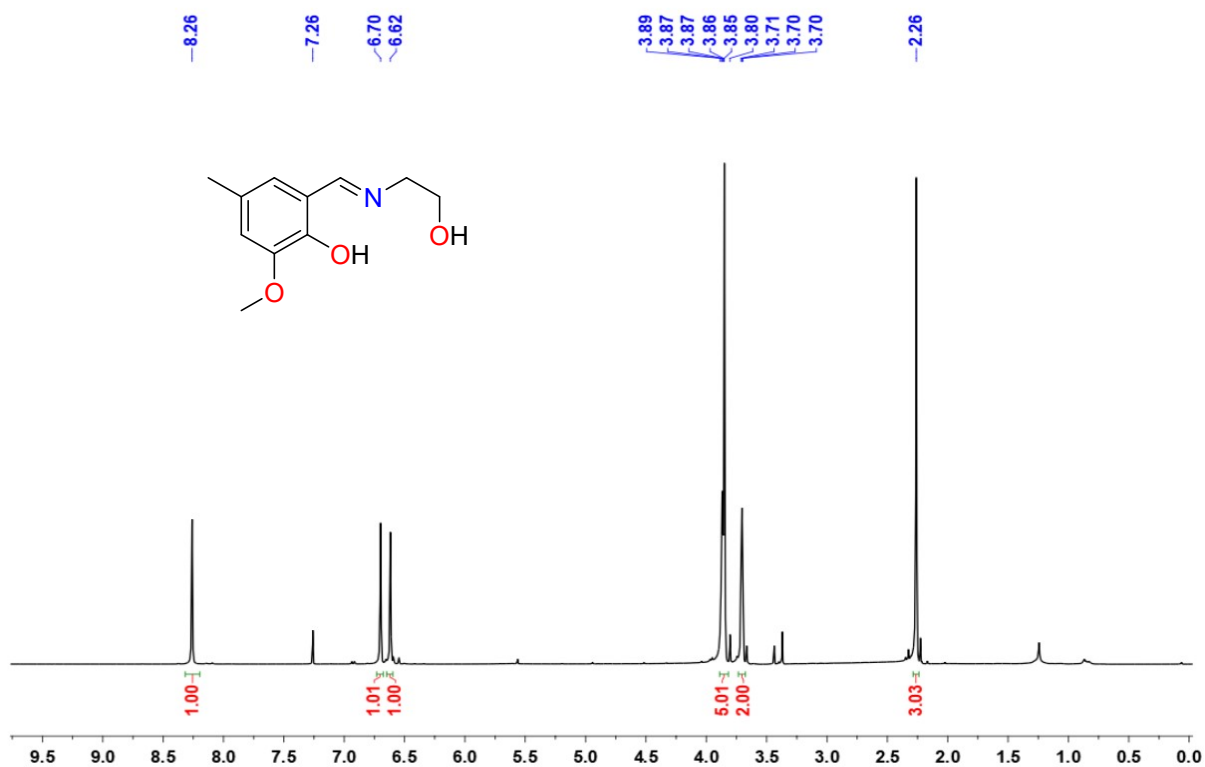

**Fig. S4:** <sup>1</sup>H NMR of 2-[(2-hydroxyethylimino)methyl]-6-methoxy-4-methylphenol (H<sub>2</sub>L<sup>2</sup>) in CDCl<sub>3</sub> at r.t.

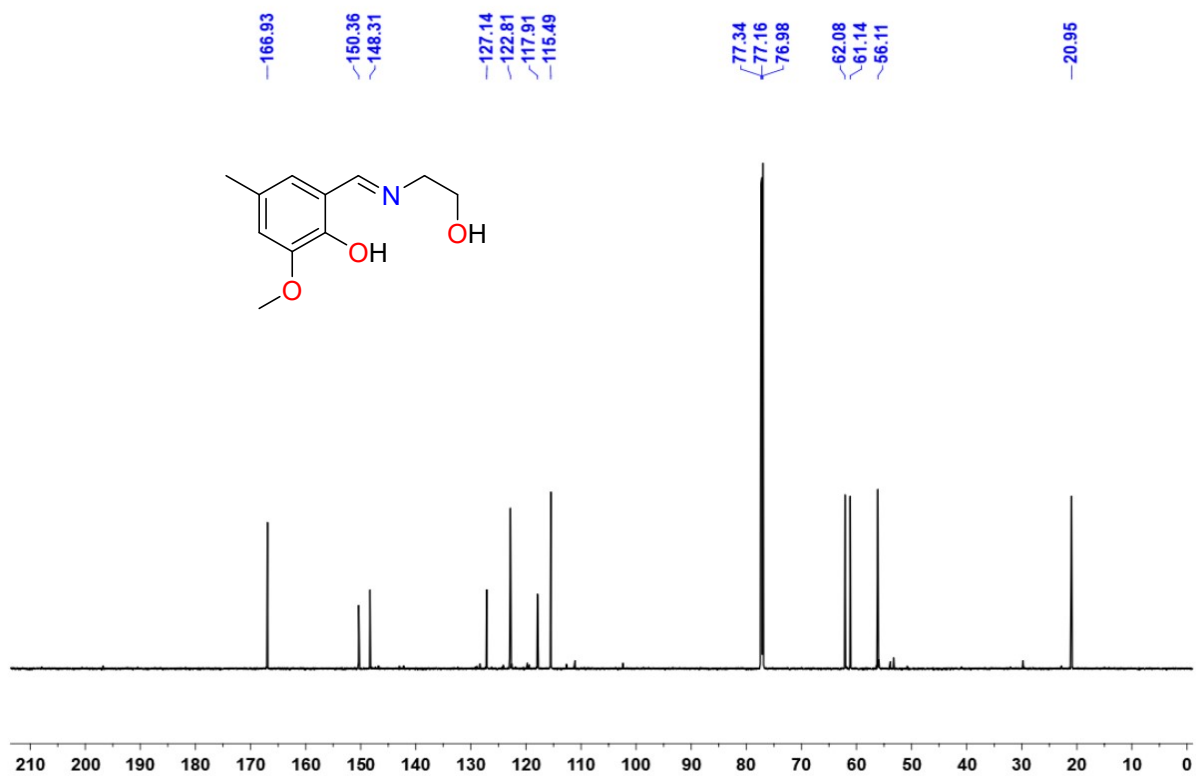

**Fig. S5:** <sup>13</sup>C NMR of 2-[(2-hydroxyethylimino)methyl]-6-methoxy-4-methylphenol (H<sub>2</sub>L<sup>2</sup>) in CDCl<sub>3</sub> at r.t.

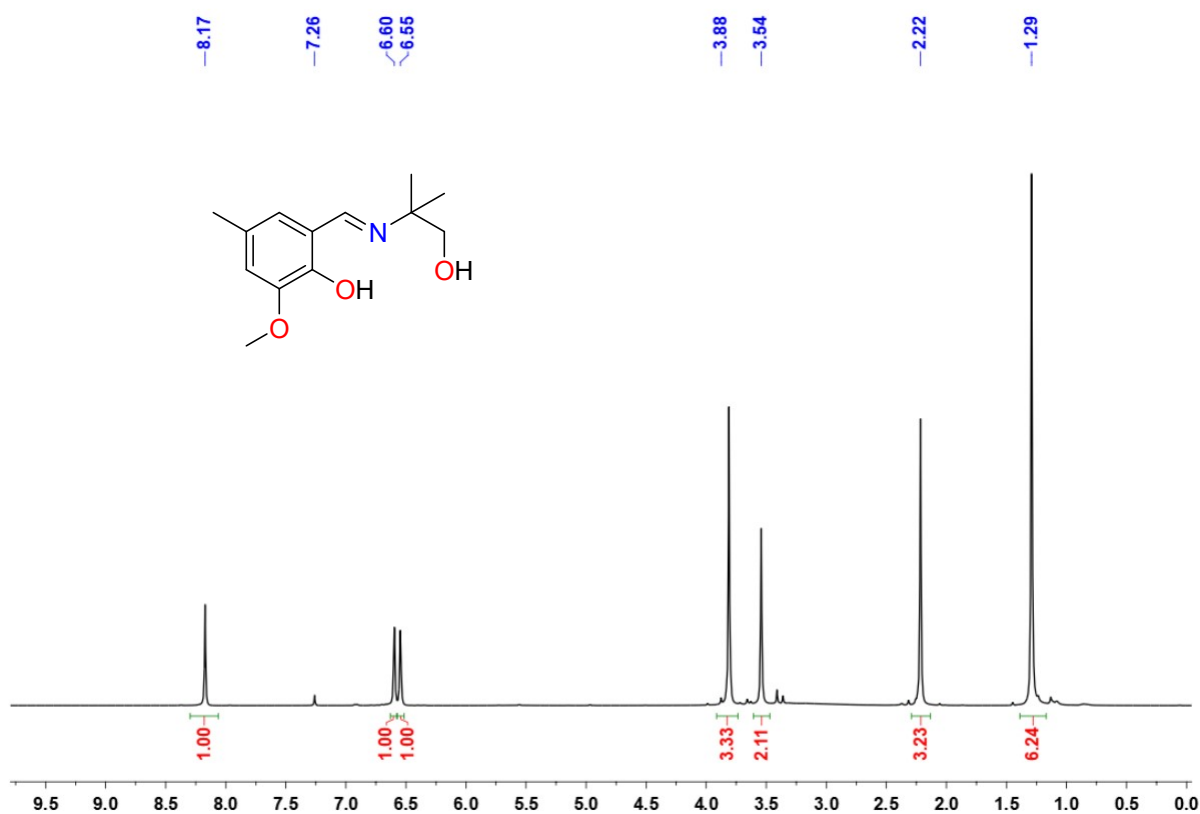

**Fig. S6:** <sup>1</sup>H NMR of 2-[(1-hydroxy-2-methylpropan-2-ylimino)methyl]-6-methoxy-4-methylphenol (H<sub>2</sub>L<sup>3</sup>) in CDCl<sub>3</sub> at r.t.

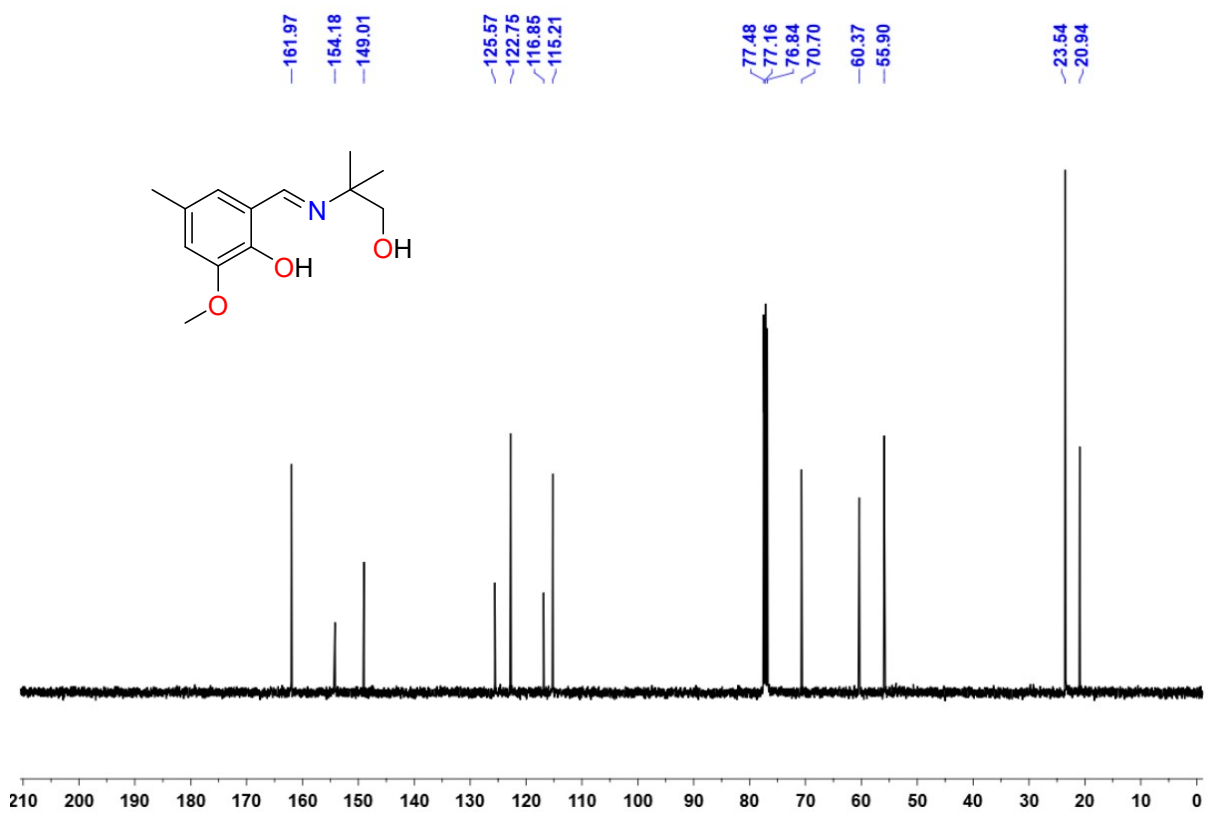

**Fig. S7:**  $^{13}C$  NMR of 2-[(1-hydroxy-2-methylpropan-2-ylimino)methyl]-6-methoxy-4-methylphenol ( $H_2L^3$ ) in  $CDCl_3$  at r.t.

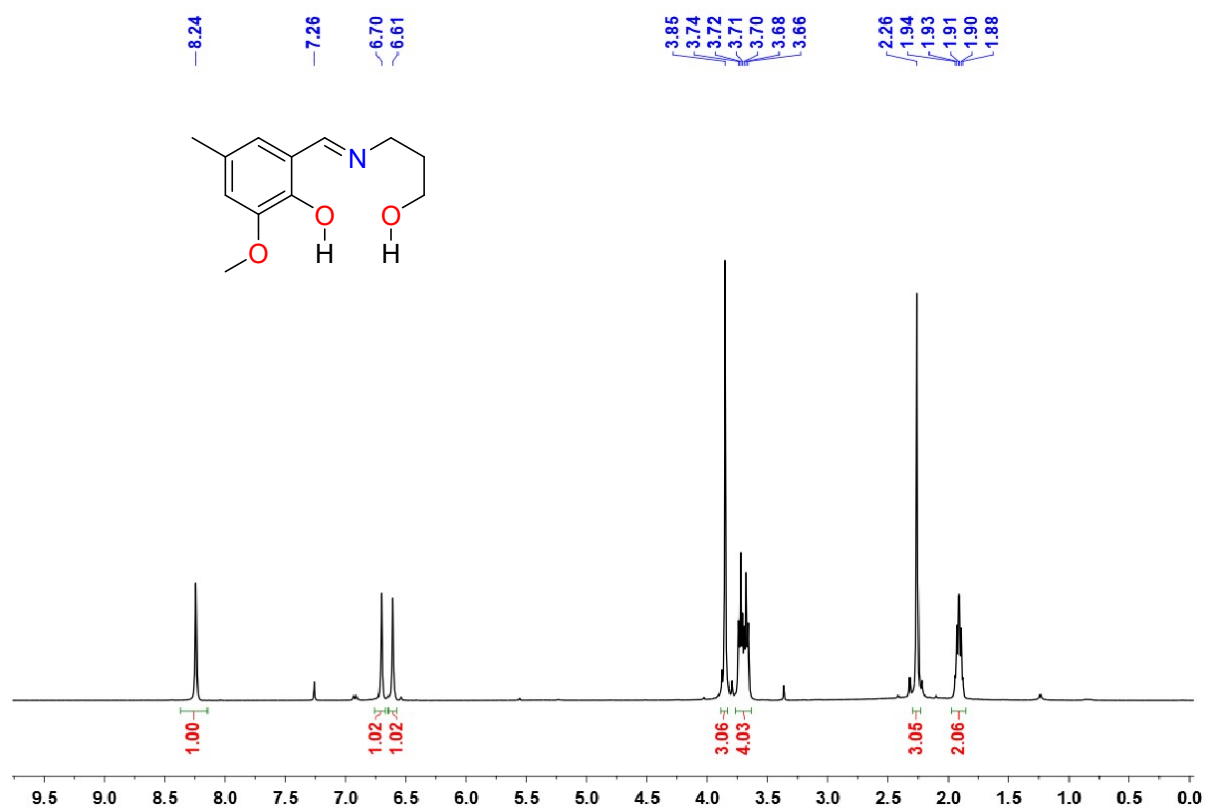

**Fig. S8:**  $^1H$  NMR of 2-[(3-hydroxypropylimino)methyl]-6-methoxy-4-methylphenol ( $H_2L^4$ ) in  $CDCl_3$  at r.t.

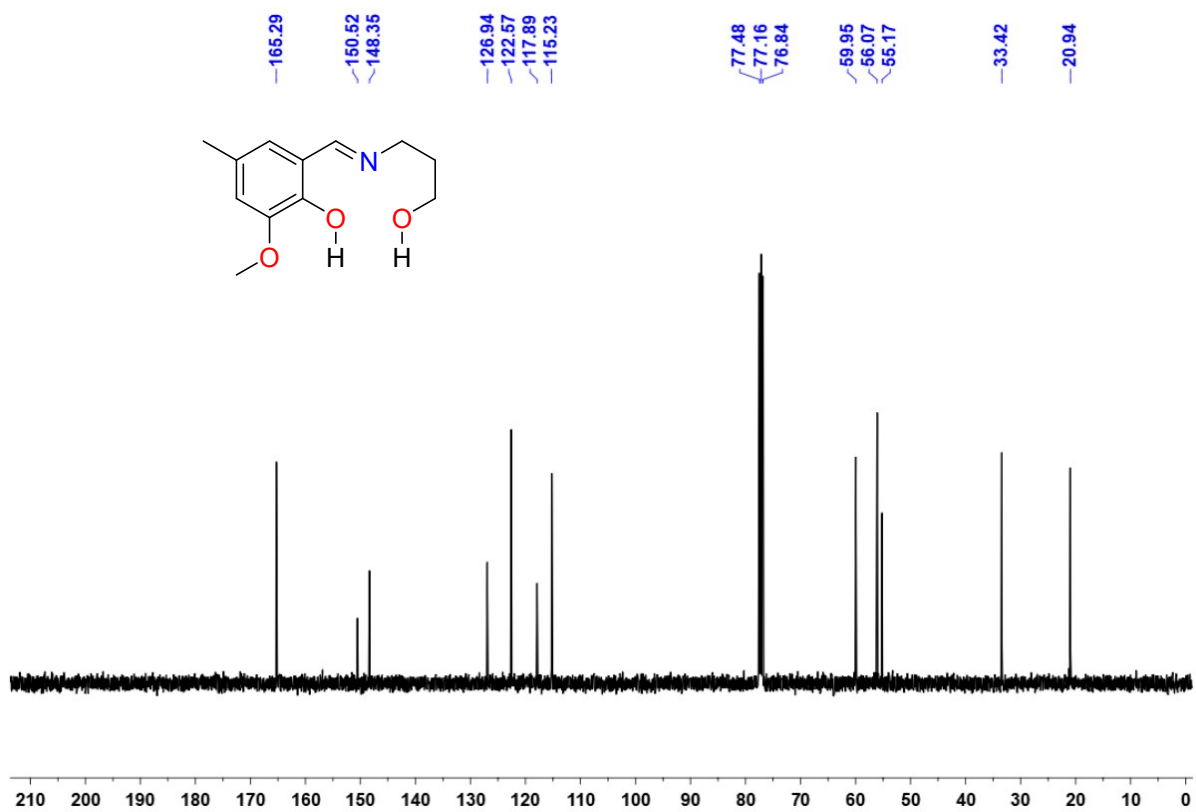

**Fig. S9:**  $^{13}C$  NMR of 2-[(3-hydroxypropylimino)methyl]-6-methoxy-4-methylphenol ( $H_2L^4$ ) in  $CDCl_3$  at r.t.

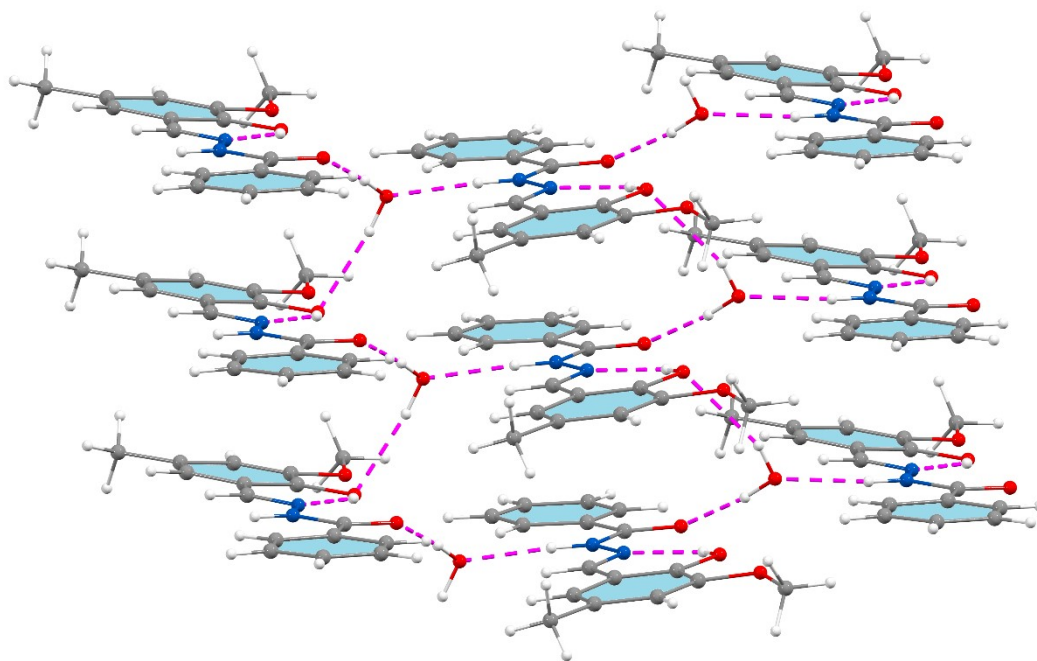

**Fig. S10.** Crystal packing of Schiff base  $H_2L^1$ .



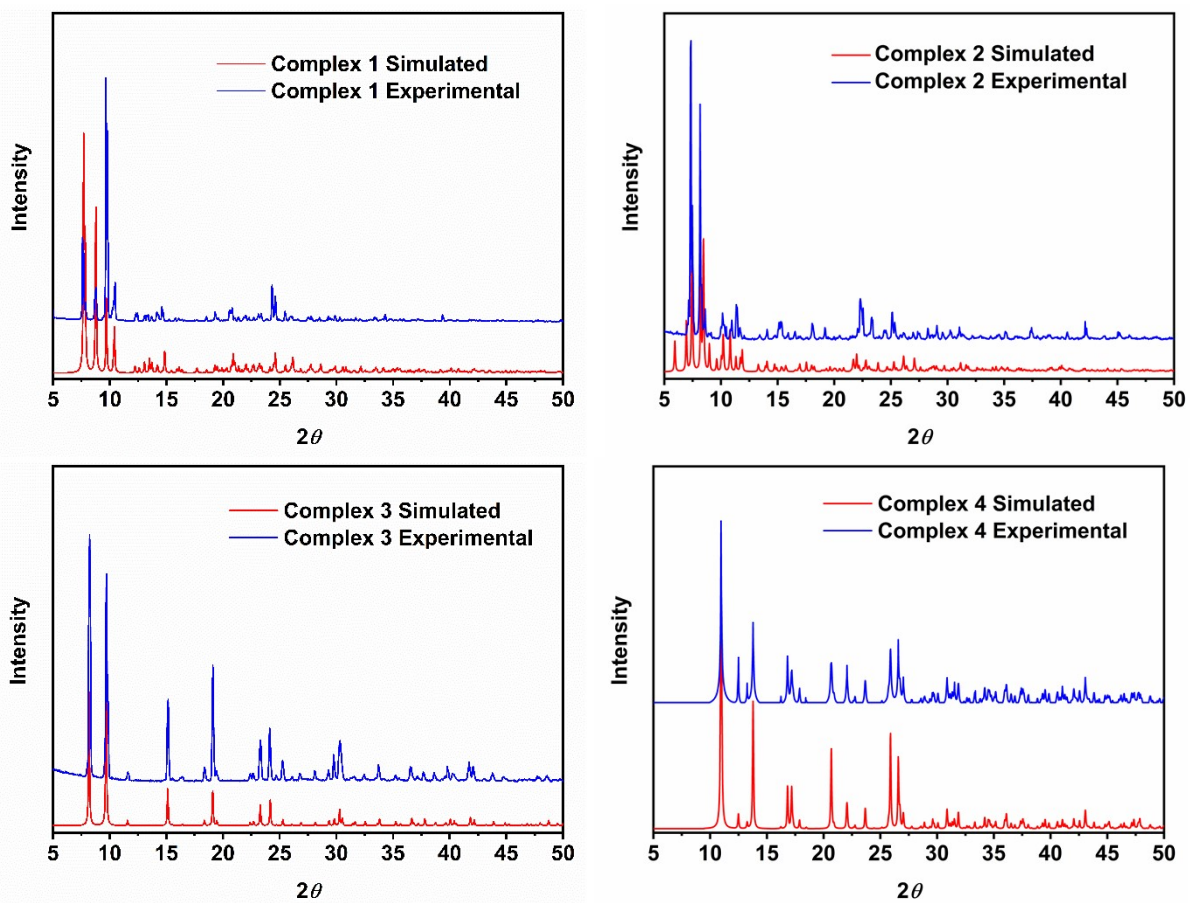

**Fig. S11:** Simulated and experimental powder X-ray data of the complexes.

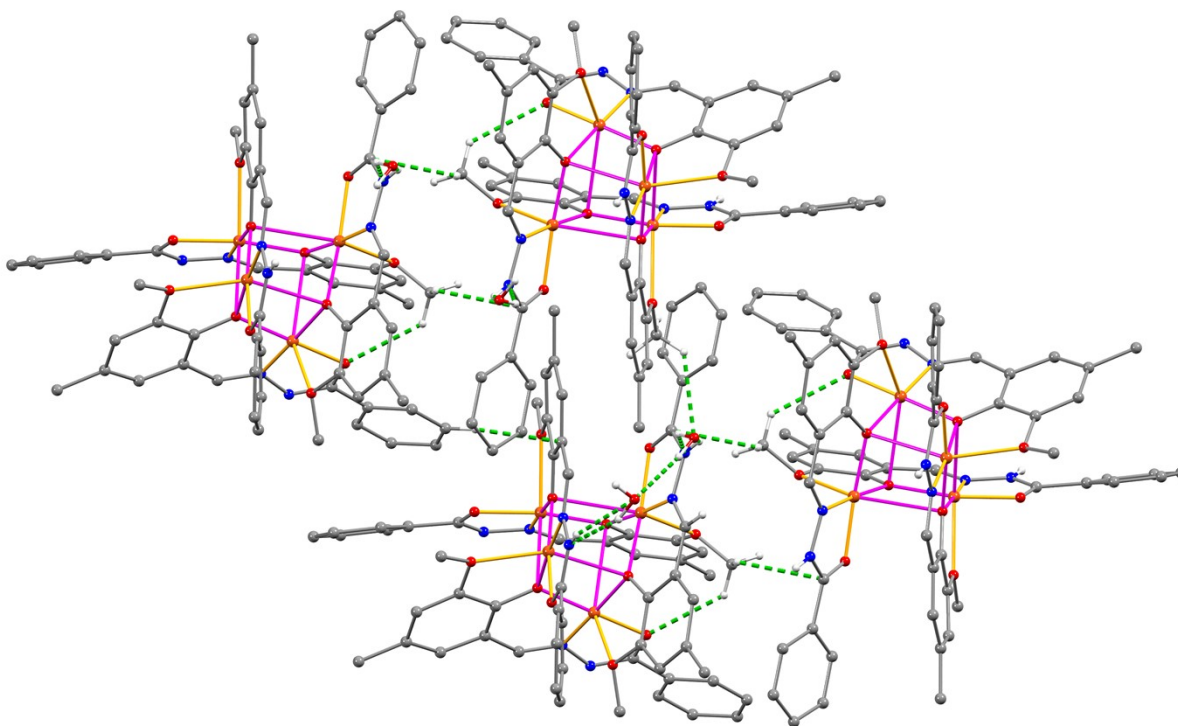

**Fig. S12:** A part of crystal packing in complex 1 displaying various hydrogen bonding with solvated water molecule and C-H... $\pi$  interactions.



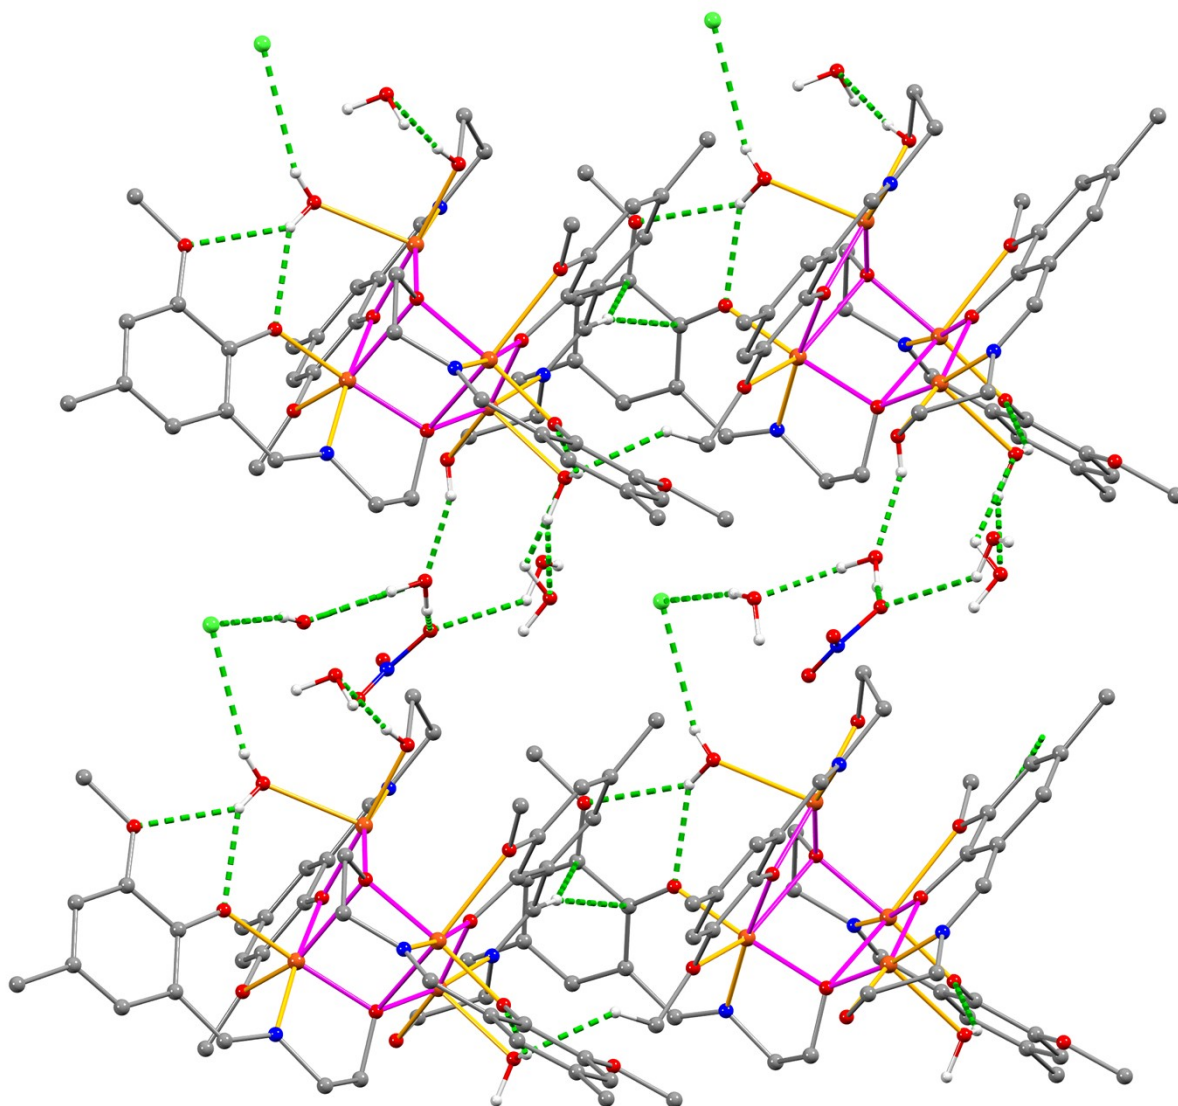

**Fig. S13.** A part of crystal packing in complex **2** displaying various hydrogen bonding with solvated water molecule and C–H $\cdots$  $\pi$  interactions.

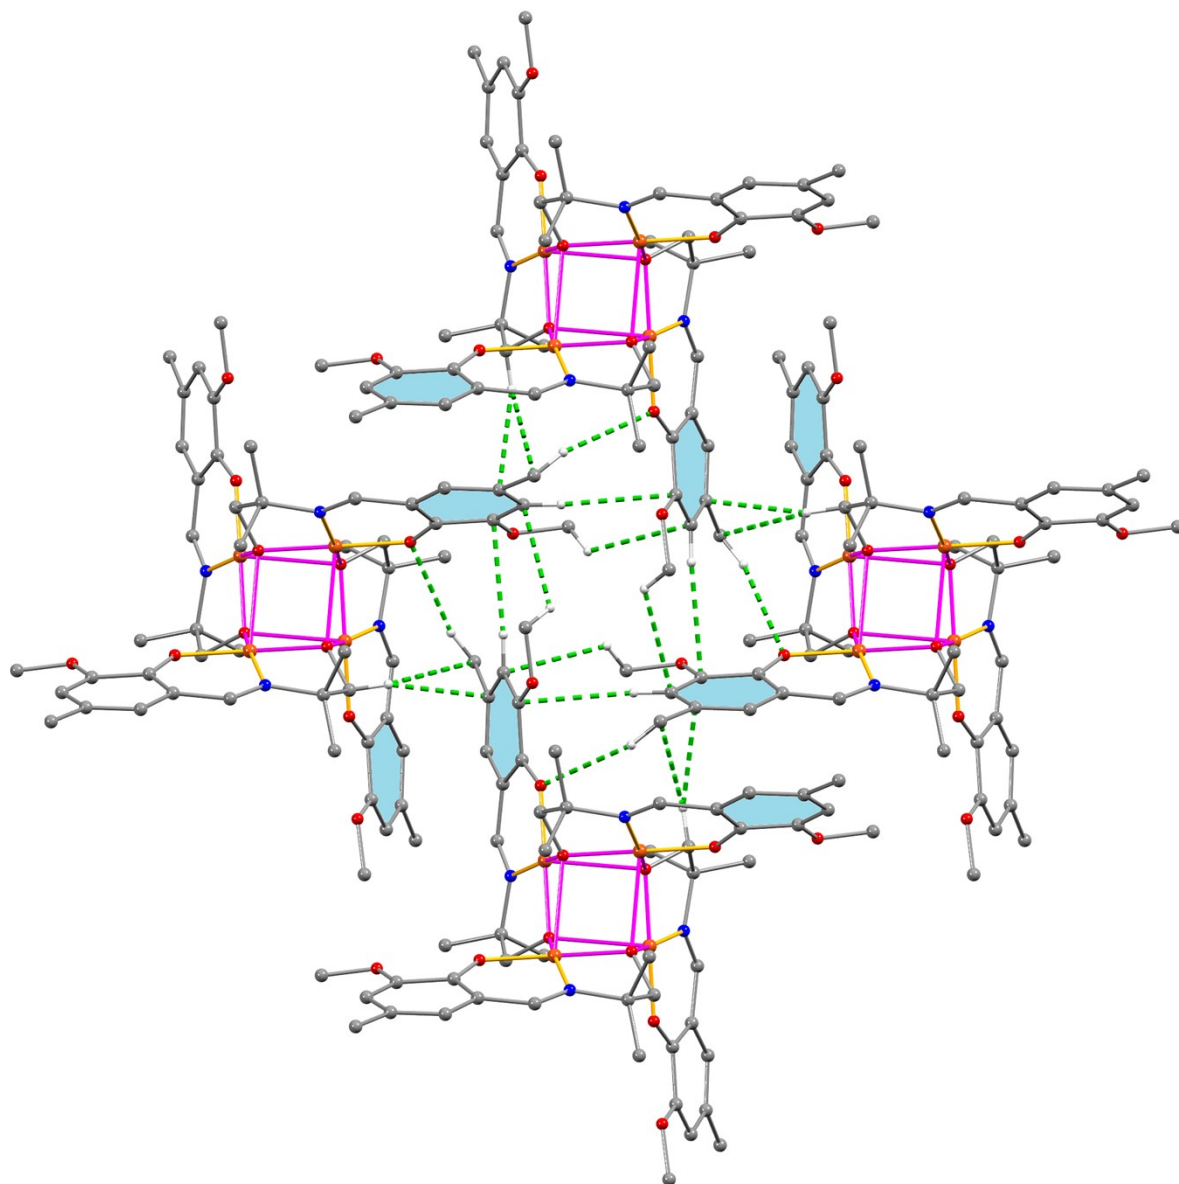

**Fig. S14.** A part of crystal packing in complex **3** displaying  $\pi$ - $\pi$  stacking and C-H... $\pi$  interactions.

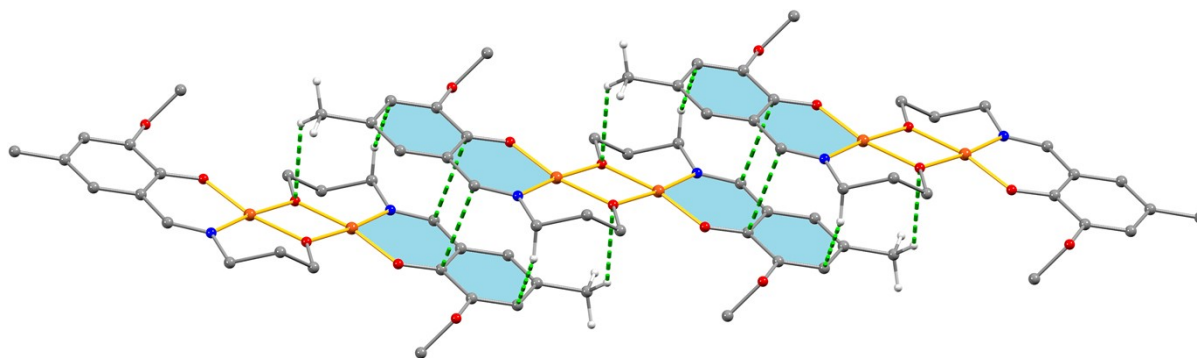

**Fig. S15.** A part of crystal packing in complex **4** displaying  $\pi$ - $\pi$  stacking and C-H... $\pi$  interactions.

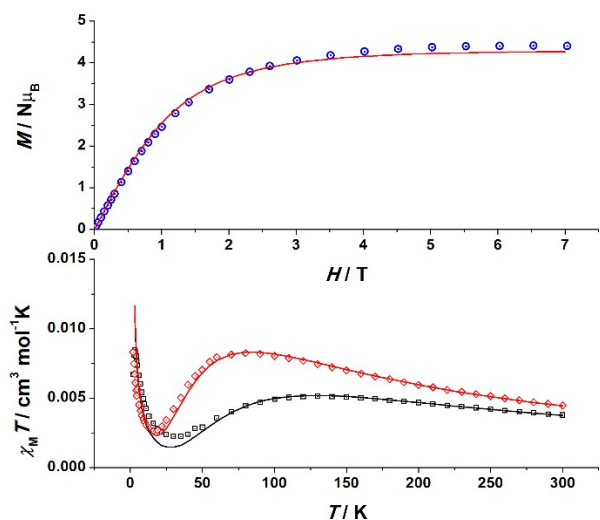

**Fig. S16.** Top, magnetization plot for complex **3**, measured at 2 K. Bottom, susceptibility versus temperature plot for complexes **1** (red diamonds) and **2** (black squares. Solid lines show the best fit of the data).

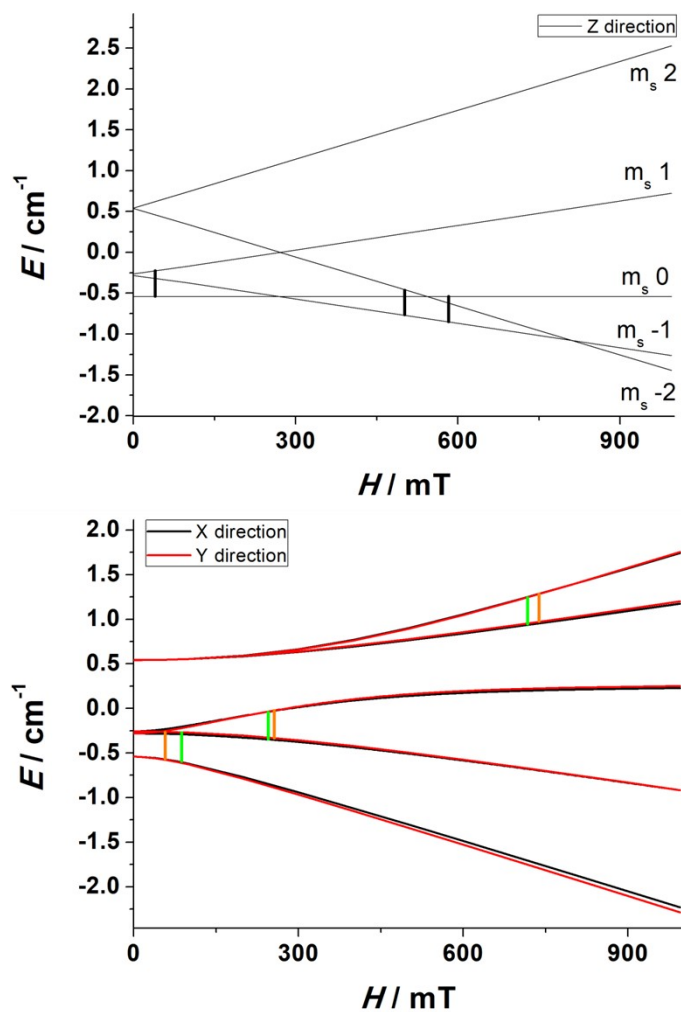

**Fig. S17:** Zeeman splitting of the ground spin state of complex **3** along the three main axis showing the allowed EPR transitions.

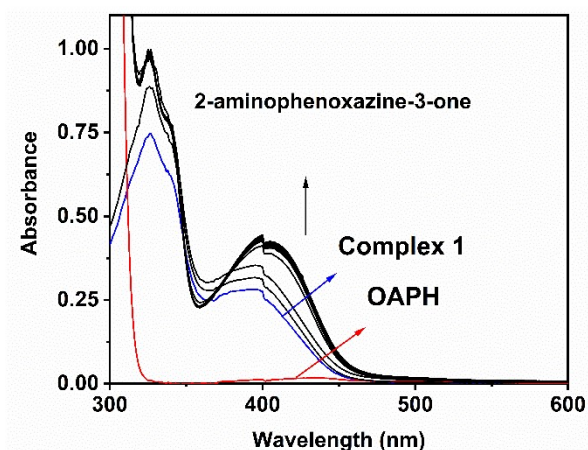

**Fig. S18:** UV-vis spectral scans for the biomimetic oxidation of *o*-aminophenol (OAPH) showing the negligible oxidation for the complexes **1**.

**Table S1.** Crystal data and structure refinement for Schiff base  $H_2L^1$  and complexes **1–4**.

| Identification code                            | $H_2L^1$                                 | Complex-1                               | <b>2</b>                                | <b>3</b>                                | <b>4</b>                                |
|------------------------------------------------|------------------------------------------|-----------------------------------------|-----------------------------------------|-----------------------------------------|-----------------------------------------|
| Empirical formula                              | $C_{16}H_{18}N_2O_4$                     | $C_{64}H_{59}Cu_4N_8O_{13.5}$           | $C_{44}H_{66}ClN_5O_{21}Cu_4$           | $C_{52}H_{68}N_4O_{12}Cu_4$             | $C_{12}H_{15}NO_3Cu$                    |
| Formula weight                                 | 302.32                                   | 1410.35                                 | 1290.62                                 | 1195.26                                 | 284.79                                  |
| Temperature/K                                  | 150                                      | 100                                     | 150                                     | 150                                     | 150                                     |
| Crystal system                                 | orthorhombic                             | orthorhombic                            | monoclinic                              | tetragonal                              | monoclinic                              |
| Space group                                    | $P2_12_12_1$                             | $Aea2$                                  | $P2_1/c$                                | $\bar{I}4$                              | $P2_1/c$                                |
| a/Å                                            | 4.86772(10)                              | 36.4484(7)                              | 11.9803(8)                              | 15.2634(9)                              | 8.89510(10)                             |
| b/Å                                            | 13.6394(2)                               | 23.7380(4)                              | 25.4313(17)                             | 15.2634(9)                              | 12.8395(2)                              |
| c/Å                                            | 22.0354(4)                               | 14.0430(3)                              | 18.5445(13)                             | 11.3683(11)                             | 10.8447(2)                              |
| $\alpha/^\circ$                                | 90                                       | 90                                      | 90                                      | 90                                      | 90                                      |
| $\beta/^\circ$                                 | 90                                       | 90                                      | 98.038(2)                               | 90                                      | 107.378(1)                              |
| $\gamma/^\circ$                                | 90                                       | 90                                      | 90                                      | 90                                      | 90                                      |
| Volume/Å <sup>3</sup>                          | 1462.99(5)                               | 12150.2(4)                              | 5594.5(7)                               | 2648.5(4)                               | 1182.02(3)                              |
| Z                                              | 4                                        | 8                                       | 4                                       | 2                                       | 4                                       |
| $\rho_{calc}/cm^3$                             | 1.373                                    | 1.542                                   | 1.532                                   | 1.499                                   | 1.600                                   |
| $\mu/mm^{-1}$                                  | 0.824                                    | 1.454                                   | 1.625                                   | 1.648                                   | 1.842                                   |
| F(000)                                         | 640.0                                    | 5784.0                                  | 2664.0                                  | 1240.0                                  | 588.0                                   |
| Radiation                                      | Cu K $\alpha$<br>( $\lambda = 1.54184$ ) | MoK $\alpha$<br>( $\lambda = 0.71073$ ) |
| 2 $\Theta$ range for data collection/ $^\circ$ | 3.811 to 77.795                          | 4.044 to 59.296                         | 3.788 to 52.806                         | 5.338 to 50.692                         | 4.798 to 58.304                         |

|                                                |                                                             |                                                             |                                                             |                                                             |                                                             |
|------------------------------------------------|-------------------------------------------------------------|-------------------------------------------------------------|-------------------------------------------------------------|-------------------------------------------------------------|-------------------------------------------------------------|
| Reflections collected                          | 8671                                                        | 61970                                                       | 60266                                                       | 44800                                                       | 26264                                                       |
| Independent reflections                        | 2943                                                        | 13458                                                       | 11438                                                       | 2403                                                        | 3031                                                        |
|                                                | [R <sub>int</sub> = 0.0512,<br>R <sub>sigma</sub> = 0.0485] | [R <sub>int</sub> = 0.0575,<br>R <sub>sigma</sub> = 0.0440] | [R <sub>int</sub> = 0.0396,<br>R <sub>sigma</sub> = 0.0319] | [R <sub>int</sub> = 0.0413,<br>R <sub>sigma</sub> = 0.0155] | [R <sub>int</sub> = 0.0327,<br>R <sub>sigma</sub> = 0.0171] |
| Data/restraints/parameters                     | 2943/3/212                                                  | 13458/934/924                                               | 11438/62/714                                                | 2403/0/168                                                  | 3031/0/156                                                  |
| Goodness-of-fit on F <sup>2</sup>              | 1.067                                                       | 1.035                                                       | 1.024                                                       | 1.065                                                       | 1.045                                                       |
| Final R indexes [I>2σ (I)]                     | R <sub>1</sub> = 0.0364,<br>wR <sub>2</sub> = 0.0953        | R <sub>1</sub> = 0.0478,<br>wR <sub>2</sub> = 0.1045        | R <sub>1</sub> = 0.0522,<br>wR <sub>2</sub> = 0.1521        | R <sub>1</sub> = 0.0156,<br>wR <sub>2</sub> = 0.0428        | R <sub>1</sub> = 0.0203,<br>wR <sub>2</sub> = 0.0531        |
| Final R indexes [all data]                     | R <sub>1</sub> = 0.0393,<br>wR <sub>2</sub> = 0.0974        | R <sub>1</sub> = 0.0602,<br>wR <sub>2</sub> = 0.1111        | R <sub>1</sub> = 0.0720,<br>wR <sub>2</sub> = 0.1668        | R <sub>1</sub> = 0.0163,<br>wR <sub>2</sub> = 0.0432        | R <sub>1</sub> = 0.0222,<br>wR <sub>2</sub> = 0.0541        |
| Largest diff. peak/hole /<br>e Å <sup>-3</sup> | 0.18/-0.24                                                  | 0.67/-0.38                                                  | 2.48/-0.57                                                  | 0.39/-0.16                                                  | 0.35/-0.25                                                  |
| Flack parameter                                | 0.08(16)                                                    | -0.013(12)                                                  | -                                                           | 0.013(13)                                                   | -                                                           |

**Table S2.** Bond distances (in Å) and angles (°) for complex **4**.

|                                        |            |
|----------------------------------------|------------|
| Parameters                             | 4          |
| Cu1–O1                                 | 1.8930(8)  |
| Cu1–O3 <sup>1</sup>                    | 1.9359(8)  |
| Cu1–O3                                 | 1.9184(8)  |
| Cu1–N1                                 | 1.9453(10) |
| Cu1···Cu1 <sup>1</sup>                 | 3.0494(3)  |
| Cu1–O3–Cu1 <sup>1</sup>                | 104.59(4)  |
| Symmetry code: <sup>1</sup> -x,1-y,1-z |            |

**Table S3.** Calculated energy for the spin levels of the ferromagnetic complex **3** and their population at low temperature.

| Spin | Energy (cm <sup>-1</sup> ) | Population at 2K |
|------|----------------------------|------------------|
| 2.0  | 0.00                       | 100.00           |
| 0.0  | 65.84                      | 0.00             |
| 1.0  | 65.84                      | 0.00             |
| 1.0  | 65.84                      | 0.00             |
| 1.0  | 131.68                     | 0.00             |
| 0.0  | 197.52                     | 0.00             |
